# Supplementary material for: The Cost-Effectiveness of 13-Valent Pneumococcal Conjugate Vaccine in Seven Chinese Cities
Source: MDPI journal article supplement (doi:10.3390/vaccines9111368), 2021-11-20
Supplement: s1 [file s1]

Table S1. Estimate of Incidence Rates.

| <b>PNEUMOCOCCAL BACTEREMIA</b>                 | <b>0 - &lt; 2</b>  | <b>2 - 4</b>       | <b>5 - 17</b>       | <b>18 - 34</b>     | <b>35 - 49</b>     | <b>50 - 64</b>     | <b>65+</b>          |
|------------------------------------------------|--------------------|--------------------|---------------------|--------------------|--------------------|--------------------|---------------------|
| CHIRA                                          |                    |                    |                     |                    |                    |                    |                     |
| Shen et al. 2018 (CHIRA 2011)                  | 2.66               | 8.35               | 0.94                | 2.28               | 0.32               | 0.87               | 0.98                |
| CHIRA 2013-2015                                | 0.14               | 0.29               | 0.31                | 0.55               | 0.15               | 0.12               | 0.16                |
| <i>CHIRA Estimate</i>                          | <i>1.40</i>        | <i>4.32</i>        | <i>0.63</i>         | <i>1.42</i>        | <i>0.24</i>        | <i>0.50</i>        | <i>0.57</i>         |
| NHIRD                                          |                    |                    |                     |                    |                    |                    |                     |
| Mo et al. 2016 (NHIRD 2002-2007)               | 3.81               | 3.80               | 0.22                | 0.18               | 0.36               | 0.82               | 4.47                |
| Zhou et al. 2018 (NHIRD 2007)                  | 10.01              | 12.50              | 0.74                | 0.90               | 0.99               | 1.00               | 9.80                |
| <i>NHIRD Estimate</i>                          | <i>6.91</i>        | <i>8.15</i>        | <i>0.48</i>         | <i>0.54</i>        | <i>0.68</i>        | <i>0.91</i>        | <i>7.14</i>         |
| Chen et al.                                    |                    |                    |                     |                    |                    |                    |                     |
| Hu et al. 2014                                 | 4.48               | 5.00               | 48.81               | 8.25               | 8.48               | 9.21               | 36.00               |
| Caldwell et al. 2014                           | 4.80               | 4.70               | 48.80               | 16.70              | 16.70              | 9.20               | 36.00               |
| <i>Chen et al. Estimate</i>                    | <i>4.64</i>        | <i>4.85</i>        | <i>48.81</i>        | <i>12.48</i>       | <i>12.59</i>       | <i>9.21</i>        | <i>36.00</i>        |
| <i>Che et al. 2014</i>                         | <i>10.20</i>       | <i>9.47</i>        | -----               | -----              | -----              | -----              | -----               |
| <i>Maurer et al. 2016</i>                      | <i>1.98</i>        | <i>1.98</i>        | -----               | -----              | -----              | -----              | -----               |
| <b><i>Pneumococcal Bacteremia Estimate</i></b> | <b><i>5.03</i></b> | <b><i>5.75</i></b> | <b><i>16.64</i></b> | <b><i>4.81</i></b> | <b><i>4.50</i></b> | <b><i>3.54</i></b> | <b><i>14.57</i></b> |
| <b>PNEUMOCOCCAL MENINGITIS</b>                 | <b>0 - &lt; 2</b>  | <b>2 - 4</b>       | <b>5 - 17</b>       | <b>18 - 34</b>     | <b>35 - 49</b>     | <b>50 - 64</b>     | <b>65+</b>          |
| CHIRA                                          |                    |                    |                     |                    |                    |                    |                     |
| Shen et al. 2018 (CHIRA 2011)                  | 1.25               | 0.58               | 1.10                | 0.64               | 0.24               | 0.20               | 0.10                |
| CHIRA 2013-2015                                | 0.05               | 0.03               | 0.07                | 0.03               | 0.03               | 0.02               | 0.02                |
| <i>CHIRA Estimate</i>                          | <i>0.65</i>        | <i>0.31</i>        | <i>0.59</i>         | <i>0.34</i>        | <i>0.14</i>        | <i>0.11</i>        | <i>0.06</i>         |
| NHIRD                                          |                    |                    |                     |                    |                    |                    |                     |
| Mo et al. 2016 (NHIRD 2002-2007)               | 1.48               | 0.53               | 0.11                | 0.04               | 0.04               | 0.08               | 0.14                |
| Zhou et al. 2018 (NHIRD 2007)                  | 3.89               | 1.70               | 0.36                | 0.20               | 0.11               | 0.10               | 0.20                |
| <i>NHIRD Estimate</i>                          | <i>2.69</i>        | <i>1.12</i>        | <i>0.24</i>         | <i>0.12</i>        | <i>0.08</i>        | <i>0.09</i>        | <i>0.17</i>         |
| Chen et al.                                    |                    |                    |                     |                    |                    |                    |                     |
| Hu et al. 2014                                 | 2.82               | 0.33               | 14.58               | 2.46               | 2.83               | 3.41               | 6.86                |
| Caldwell et al. 2014                           | 2.50               | 0.60               | 14.60               | 5.20               | .20                | 3.40               | 6.90                |
| <i>Chen et al. Estimate</i>                    | <i>2.66</i>        | <i>0.47</i>        | <i>14.59</i>        | <i>3.83</i>        | <i>4.02</i>        | <i>3.41</i>        | <i>6.88</i>         |
| <i>Che et al. 2014</i>                         | <i>5.10</i>        | <i>4.73</i>        | -----               | -----              | -----              | -----              | -----               |
| <i>Maurer et al. 2016</i>                      | <i>1.33</i>        | <i>1.33</i>        | -----               | -----              | -----              | -----              | -----               |
| <b><i>Pneumococcal Meningitis Estimate</i></b> | <b><i>2.49</i></b> | <b><i>1.59</i></b> | <b><i>5.14</i></b>  | <b><i>1.43</i></b> | <b><i>1.41</i></b> | <b><i>1.20</i></b> | <b><i>2.37</i></b>  |
| <b>PNEUMONIA - INPATIENT</b>                   | <b>0 - &lt; 2</b>  | <b>2 - 4</b>       | <b>5 - 17</b>       | <b>18 - 34</b>     | <b>35 - 49</b>     | <b>50 - 64</b>     | <b>65+</b>          |
| CHIRA                                          |                    |                    |                     |                    |                    |                    |                     |
| Shen et al. 2018 (CHIRA 2011)                  | 14,857             | 14,059             | 13,370              | 2,193              | 1,131              | 1,252              | 1,894               |
| CHIRA 2013-2015                                | 24,581             | 25,361             | 12,683              | 2,038              | 1,248              | 1,189              | 1,818               |
| <i>CHIRA Estimate</i>                          | <i>19,719</i>      | <i>19,710</i>      | <i>13,027</i>       | <i>2,116</i>       | <i>1,190</i>       | <i>1,221</i>       | <i>1,856</i>        |

|                                               |                   |               |               |                |                |                |              |
|-----------------------------------------------|-------------------|---------------|---------------|----------------|----------------|----------------|--------------|
| NHIRD                                         |                   |               |               |                |                |                |              |
| Mo et al. 2016 (NHIRD 2002-2007)              | 4,625             | 3,884         | 459           | 104            | 118            | 367            | 2,849        |
| Zhou et al. 2018 (NHIRD 2007)                 | 1,274             | 1,477         | 210           | 115            | 104            | 244            | 2,008        |
| <i>NHIRD Estimate</i>                         | 2,949             | 2,681         | 334           | 110            | 111            | 305            | 2,428        |
| LITERATURE                                    |                   |               |               |                |                |                |              |
| Hu et al. 2014                                | 4,239             | 3,830         | 664           | 113            | 215            | 443            | 3,700        |
| Caldwell et al. 2014                          | 4,239             | 3,830         | 664           | 164            | 164            | 443            | 3,700        |
| <i>Literature Estimate</i>                    | 4,239             | 3,830         | 664           | 139            | 190            | 443            | 3,700        |
| <b><i>Pneumonia – Inpatient Estimate</i></b>  | <b>8,969</b>      | <b>8,740</b>  | <b>4,675</b>  | <b>788</b>     | <b>497</b>     | <b>656</b>     | <b>2,661</b> |
| <b>PNEUMONIA - OUTPATIENT</b>                 | <b>0 - &lt; 2</b> | <b>2 - 4</b>  | <b>5 - 17</b> | <b>18 - 34</b> | <b>35 - 49</b> | <b>50 - 64</b> | <b>65+</b>   |
| CHIRA                                         |                   |               |               |                |                |                |              |
| Shen et al. 2018 (CHIRA 2011)                 | 2,165             | 2,238         | 861           | 254            | 220            | 177            | 190          |
| CHIRA 2013-2015                               | 970               | 1,045         | 425           | 118            | 112            | 99             | 104          |
| <i>CHIRA Estimate</i>                         | 1,568             | 1,642         | 643           | 186            | 166            | 138            | 147          |
| NHIRD                                         |                   |               |               |                |                |                |              |
| Mo et al. 2016 (NHIRD 2002-2007)              | 31,633            | 38,109        | 6,272         | 1,516          | 1,814          | 2,967          | 10,008       |
| Zhou et al. 2018 (NHIRD 2007)                 | 16,421            | 21,605        | 7,020         | 1,194          | 501            | 895            | 3,317        |
| <i>NHIRD Estimate</i>                         | 24,027            | 29,857        | 6,646         | 1,355          | 1,158          | 1,931          | 6,663        |
| <b><i>Pneumonia – Outpatient Estimate</i></b> | <b>12,797</b>     | <b>15,749</b> | <b>3,644</b>  | <b>771</b>     | <b>662</b>     | <b>1,035</b>   | <b>3,405</b> |
| <b>OTITIS MEDIA (MILD)</b>                    | <b>0 - &lt; 2</b> | <b>2 - 4</b>  | <b>5 - 17</b> | <b>18 - 34</b> | <b>35 - 49</b> | <b>50 - 64</b> | <b>65+</b>   |
| <i>CHIRA 2013-2015</i>                        | 2.32              | 29.45         | 24.87         | 5.39           | 5.89           | 3.17           | 1.63         |
| NHIRD                                         |                   |               |               |                |                |                |              |
| Mo et al. 2016 (NHIRD 2002-2007)              | 15,866            | 17,279        | 3,978         | 1,247          | 1,528          | 1,892          | 2,085        |
| Zhou et al. 2018 (NHIRD 2007)                 | 17,657            | 13,784        | -----         | -----          | -----          | -----          | -----        |
| <i>NHIRD Estimate</i>                         | 16,762            | 15,531        | 3,978         | 1,247          | 1,528          | 1,892          | 2,085        |
| <i>Shen et al. 2018</i>                       | 10,678            | 10,678        | -----         | -----          | -----          | -----          | -----        |
| <b><i>Otitis Media (Mild) Estimate</i></b>    | <b>9,147</b>      | <b>8,746</b>  | <b>2,002</b>  | <b>626</b>     | <b>767</b>     | <b>948</b>     | <b>1,043</b> |
| <b>OTITIS MEDIA (MODERATE/SEVERE)</b>         | <b>0 - &lt; 2</b> | <b>2 - 4</b>  | <b>5 - 17</b> | <b>18 - 34</b> | <b>35 - 49</b> | <b>50 - 64</b> | <b>65+</b>   |
| <i>CHIRA 2013-2015</i>                        | 15.53             | 105.07        | 98.43         | 10.62          | 8.39           | 4.99           | 2.19         |
| NHIRD                                         |                   |               |               |                |                |                |              |
| Mo et al. 2016 (NHIRD 2002-2007)              | 6,894             | 6,202         | 889           | 134            | 252            | 343            | 361          |
| Zhou et al. 2018 (NHIRD 2007)                 | 2,050             | 1,704         | -----         | -----          | -----          | -----          | -----        |
| <i>NHIRD Estimate</i>                         | 4,472             | 3,953         | 889           | 134            | 252            | 343            | 361          |
| <i>Shen et al. 2018</i>                       | 3,891             | 3,891         | -----         | -----          | -----          | -----          | -----        |
| <b><i>Otitis Media (Mild) Estimate</i></b>    | <b>2,793</b>      | <b>2,650</b>  | <b>494</b>    | <b>72</b>      | <b>130</b>     | <b>174</b>     | <b>182</b>   |
